# Supplementary material for: Electrochemical preparation and properties of a Mg–Li–Y alloyviaco-reduction of Mg(ii) and Y(iii) in chloride melts
Source: Royal Society of Chemistry journal article supplement (doi:10.1039/d1ra01349a), 2021-01-01
Supplement: d1ra01349a1.pdf [file d1ra01349a1.pdf]

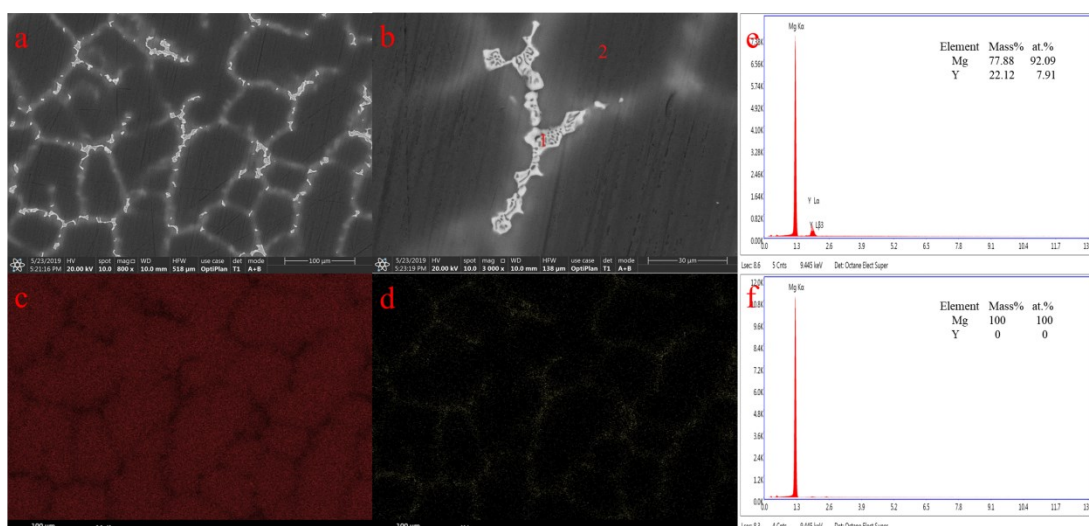

SEM (a, b), EDS mapping (c, d) and quantitative (e, f) analysis of Mg-Li-Y alloy obtained by galvanostatic electrolysis (-0.4 A) in LiCl-KCl-MgCl<sub>2</sub> (8 wt. %)-YCl<sub>3</sub> (2 wt. %) melts on the W electrode (S=0.322 cm<sup>2</sup>) at 973 K.
